# Supplementary material for: The first 2D→3D polycatenation array built on (3,4)-connected bilayer nets
Source: Royal Society of Chemistry journal article supplement (doi:10.1039/c2ce26043c), 2012-01-01
Supplement: c2ce26043c.pdf [file c2ce26043c.pdf]

## The first 2D→3D polycatenation array built on (3, 4)-connected bilayer nets

Hai-xiao Huang, Feng Luo, Gong-ming Sun, Yu-mei Song, Xiao-zhao Tian, Yan Zhu, Zi-jun Yuan, Xue-feng Feng, Ming-biao Luo

### Materials and Physical Measurements.

The acylamide ligand of **1** is synthesized according to literature method.<sup>1</sup> Others were analytically pure from commercial sources and used without further purification. Elemental analyses were performed on a Vario EL-II analyzer. Single crystal X-ray diffraction is carried out on Bruker Apex II. X-ray powder diffraction (XRPD) data were recorded in a Bruker D8 ADVANCE diffractometer. Thermal analyses were carried out in air atmosphere using SETARAM LABSYS equipment with a heating rate of 5°C/min. Steady-state photoluminescence spectra were measured on a SHIMADZU RF-5301PC spectrofluorophotometer. The sample used for measurement of photoluminescence spectra is solid and treated by tablet machine to give suitable piece. Then, this piece is fixed on a bracket of spectrofluorophotometer.

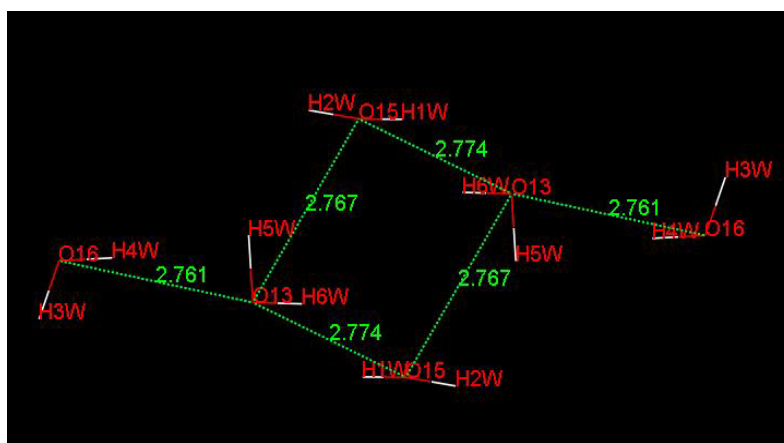

**Figure S1.** View of the atom-labelled six-nuclear water cluster: the O...O distances are highlighted in the color of green.

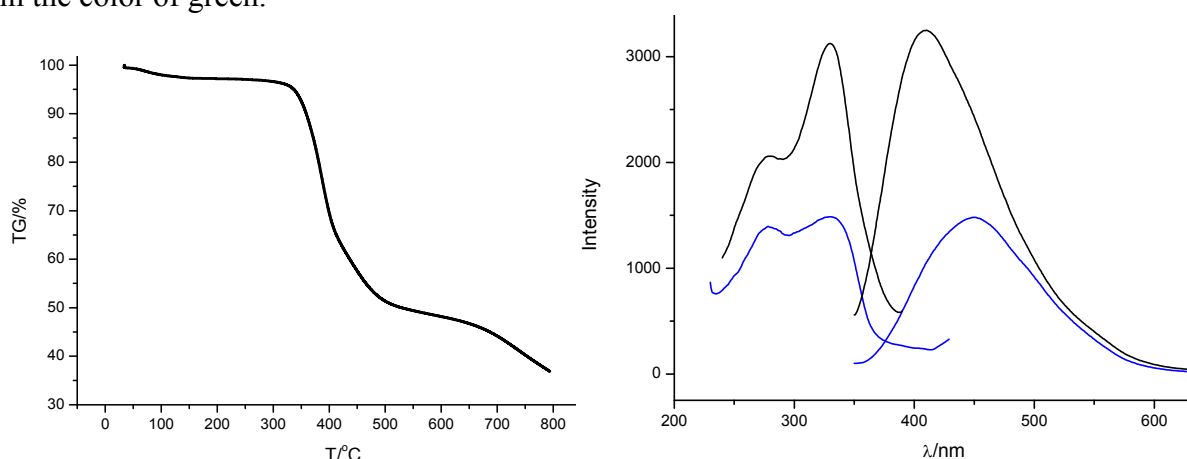

**Figure S2.** The TG and luminescence studies of **1**: the excitation spectrum and emission spectrum for **1** and L ligand is highlighted by black and blue.

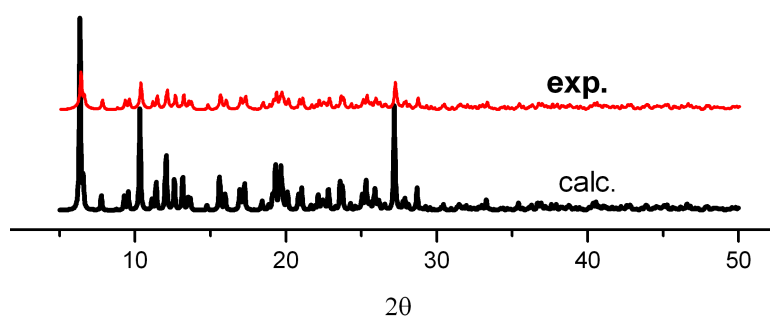

**Figure S3.** The experimental XRD pattern and the simulated XRD pattern from the single crystal data.
